# Supplementary material for: Nano-Crystalline Li1.2Mn0.6Ni0.2O2 Prepared via Amorphous Complex Precursor and Its Electrochemical Performances as Cathode Material for Lithium-Ion Batteries
Source: MDPI journal article supplement (doi:10.3390/ma9080661), 2016-08-05
Supplement: s1 [file s1]

## Supplementary Materials: Nano-Crystalline $\text{Li}_{1.2}\text{Mn}_{0.6}\text{Ni}_{0.2}\text{O}_2$ Prepared via Amorphous Complex Precursor and Its Electrochemical Performances as Cathode Material for Lithium-Ion Batteries

Xiangming He, Jixian Wang, Li Wang and Jianjun Li

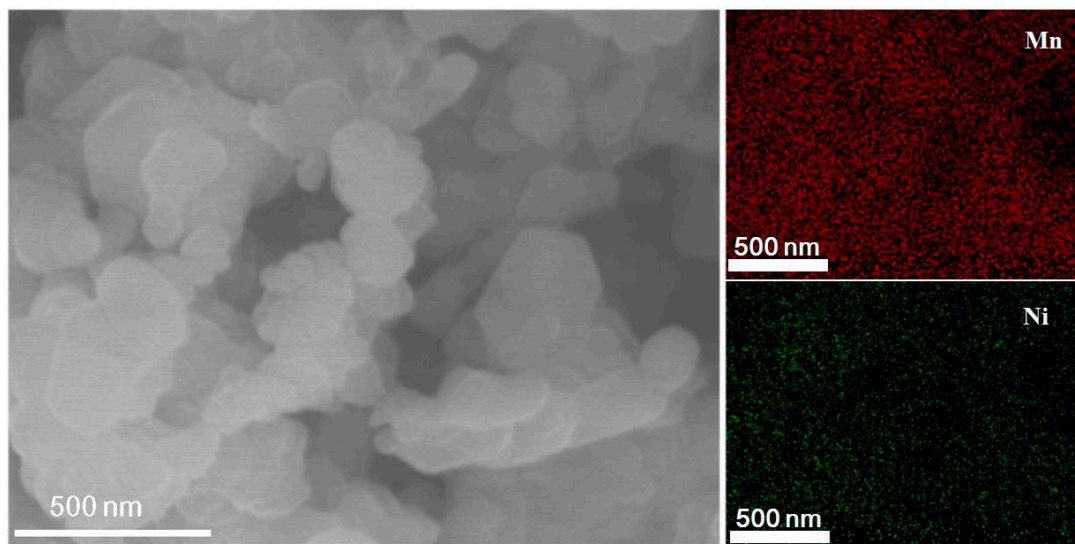

**Figure S1.** SEM photograph and EDS mapping spectra of  $\text{Li}_{1.2}\text{Mn}_{0.6}\text{Ni}_{0.2}\text{O}_2$  particles sintered at 850 °C for 10 h.

Figure S1 shows the energy-dispersive X-ray spectroscopy (EDS) mapping analysis of the  $\text{Li}_{1.2}\text{Mn}_{0.6}\text{Ni}_{0.2}\text{O}_2$  sample sintered at 850 °C for 10 h. EDS mapping verifies the uniform Mn/Ni cation distribution in the final product. The spectra illustrate that Mn/Ni cations are uniformly distributed in the final product.
